# Supplementary material
Source: Springer Nature journal article supplement (https://www.springermedizin.de/resource/supplementary/12970_2012_312_MOESM5_ESM.pdf/9594822)

# Interleukin-6 (IL-6)

Before and after 14 weeks treatment  
pre and post exercise

n = 23  
P<sub>Ex</sub> = 0.001

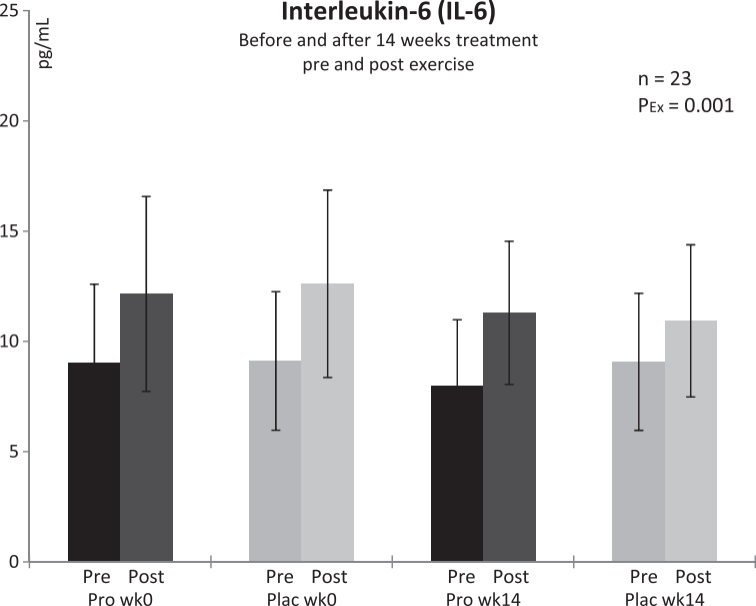

Supplement: MOESM5 [file 9594822]
